# Supplementary material for: Vapochromic and vapoluminescent response of materials based on platinum(ii) complexes intercalated into layered zirconium phosphate
Source: Royal Society of Chemistry journal article supplement (doi:10.1039/c1jm12053k), 2011-01-01
Supplement: c1jm12053k.pdf [file c1jm12053k.pdf]

## Supporting Information:

### Vapochromic and Vapoluminescent Response of Materials based on Platinum(II) Complexes Intercalated into Layered Zirconium Phosphate

Eladio J. Rivera,<sup>†</sup> Cindy Barbosa,<sup>†</sup> and Rafael Torres,<sup>†</sup> Levi Grove,<sup>‡</sup> Stephen Taylor,<sup>‡</sup> and William B. Connick,<sup>‡</sup> Abraham Clearfield,<sup>§</sup> and Jorge L. Colón<sup>\*,†</sup>

<sup>†</sup>*Department of Chemistry, University of Puerto Rico, P.O. Box 23346, Río Piedras, P.R. 00931, USA*

<sup>‡</sup>*Department of Chemistry, University of Cincinnati, P.O. Box 210172, Cincinnati, Ohio 45221-0172, USA*

<sup>§</sup>*Department of Chemistry, Texas A&M University, P.O. Box 30012, College Station, TX 77842-3012, USA*

**Materials and Methods.** Volatile organic compounds (VOCs) for the vapochromic experiments and [Pt(tpy)Cl](Cl)·2H<sub>2</sub>O were purchased from Aldrich. [Pt(Me<sub>2</sub>bzimpy)Cl](Cl)·2.5H<sub>2</sub>O was prepared as previously described.<sup>15</sup> The [Pt(Me<sub>2</sub>bzimpy)Cl]<sup>+</sup>- and [Pt(tpy)Cl]<sup>+</sup>-exchanged ZrP materials were prepared as previously described.<sup>22</sup> ZrP was suspended in aqueous solutions of [Pt(tpy)Cl]<sup>+</sup>:ZrP at various [Pt(tpy)Cl]<sup>+</sup>:ZrP molar ratios (1:25, 1:10, 1:5, 1:1, and 5:1) with constant stirring at ambient temperature for five days producing [Pt(tpy)Cl]<sup>+</sup>-intercalated ZrP materials with different loading levels. The same procedure was used to produce [Pt(Me<sub>2</sub>bzimpy)Cl]<sup>+</sup>-intercalated ZrP materials except that the ZrP was suspended in 1:1 ethanol:water solutions of [Pt(Me<sub>2</sub>bzimpy)Cl]<sup>+</sup> at 1:30, 1:10, 1:5, and 1:1 [Pt(Me<sub>2</sub>bzimpy)Cl]<sup>+</sup>:ZrP molar ratios. The materials are referenced according to the molar Pt:ZrP concentration ratio of the mixture used in their preparation. For example, the 1:1 [Pt(tpy)Cl]<sup>+</sup>-exchanged ZrP material was prepared by suspending 0.1 g of 10.3 Å-ZrP in 500 ml of a 5.1 × 10<sup>-4</sup> M [Pt(tpy)Cl]<sup>+</sup> aqueous solution. The mixture was filtered, and the solid was washed with abundant nanopure water and dried at ambient temperature for three days.

The photographs were obtained using a Kodak EasyShare C-643 digital camera. There was no processing of the images, except that a black circular frame was placed around each for contrast increase (**Image 1**). The vapochromic experiments were performed in a sealed TLC chamber (1.9 L) at room temperature, containing 25 mL of the VOC solvent and a sample holder with the intercalated materials at different loading levels. The platinum(II) complexes ([Pt(Me<sub>2</sub>bzimpy)Cl](Cl)·2.5H<sub>2</sub>O, [Pt(tpy)Cl](Cl)·2H<sub>2</sub>O) and the intercalated materials were dried

at 100°C prior to exposure to each VOC (methylene chloride, tetrahydrofuran, acetonitrile, methanol, n-hexane, and benzene). In each case, solvent uptake was confirmed within seconds by a distinct change in color. Color was checked and recorded at 30 minutes, 1 hour, 2 hours, and 1 day. Total exposure time of the intercalated materials to different solvent vapors was 1 day. The process is fully reversible as indicated by restoration of the original color upon heating the sample for several minutes at 100°C.

Emission spectra were recorded using a SE-900 spectrofluorometer (Photon Technology International, PTI) with a 150 W xenon lamp as the excitation source and a PTI 710 model photon counting detector with a Hamamatsu R1527P photomultiplier. Intercalated materials were placed at 30° from the excitation source and the detector, using a front-face illumination technique. For thin films, the emission spectra were recorded using a Cary Eclipse Fluorescence Spectrophotometer. In both cases, the excitation wavelength was 355 nm. Films were prepared by suspending ~ 2 mg of intercalated material in 1 mL of diethyl ether, and depositing the suspension on the inside of one face of a quartz cell. Upon evaporation of the ether (~15 min), the intercalated material was found to be adhered to the surface of the cell. The film was heated for 1 hr. at 100°C to drive off any remaining solvent. The cell was sealed with a septum and injected with 100 µL of the solvent which is immediately evaporated and absorbed into the intercalated material.

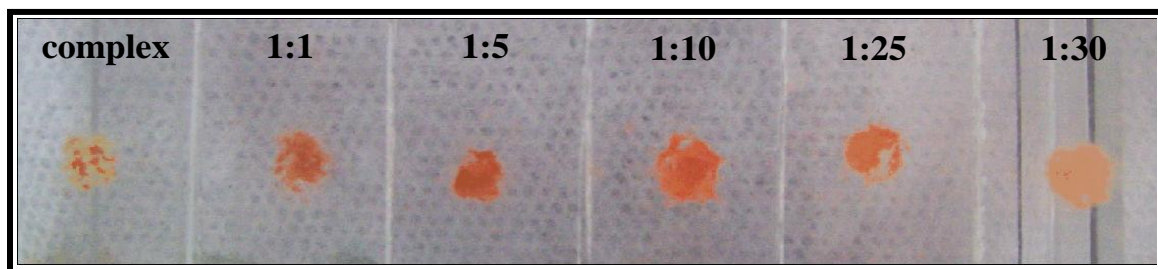

**Image 1.** Example of the photographs taken from the top view of the TLC chamber under ambient light. The image shows the  $[\text{Pt}(\text{Me}_2\text{bzimpy})\text{Cl}](\text{Cl})$  complex and  $[\text{Pt}(\text{Me}_2\text{bzimpy})\text{Cl}]^+$ -exchanged ZrP powders materials at different loading levels (Pt:ZrP) supported on glass slides after exposure to hexane vapors at room temperature.

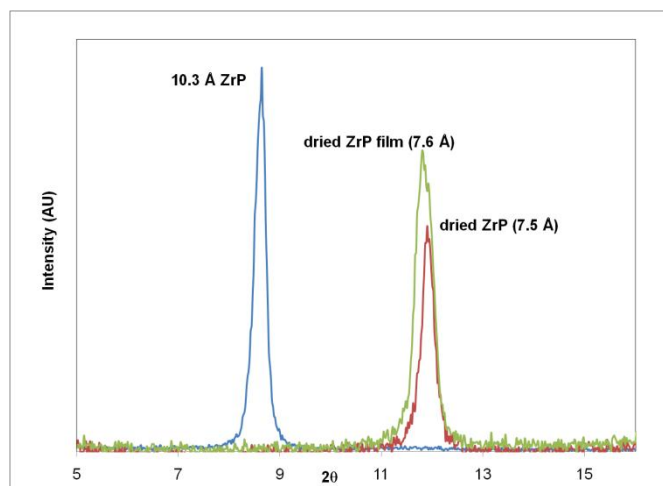

**Figure S1.** XRPD patterns of 10.3 Å-ZrP, dehydrated phase ( $\alpha$ -ZrP), and the dried ZrP film.

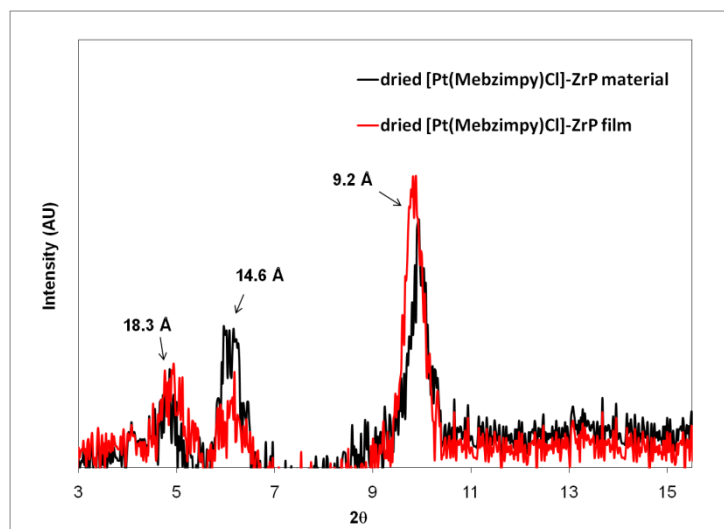

**Figure S2.** XRPD patterns of dried 1:5  $[\text{Pt}(\text{Me}_2\text{bzimpy})\text{Cl}]^+$ -exchanged ZrP materials and after the film preparation.

\*The relatively high noise level of the XRPD patterns is due to the low availability of sample.

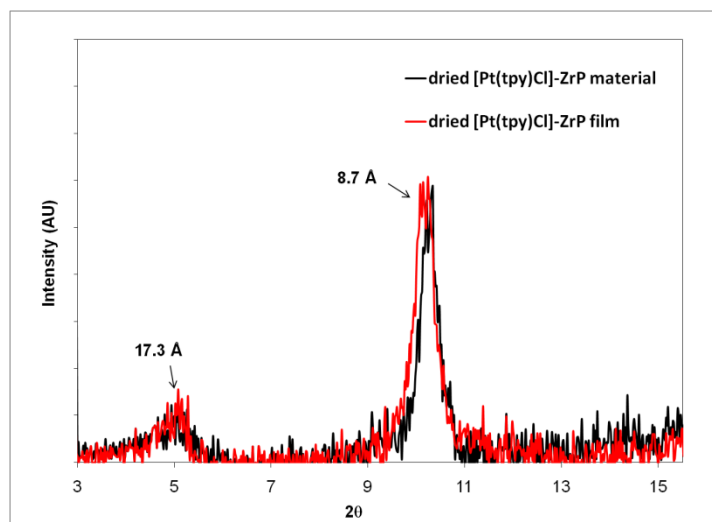

**Figure S3.** XRPD patterns of dried 1:1 [Pt(tpy)Cl]<sup>+</sup>-exchanged ZrP materials and after the film preparation. \*The relatively high noise level of the XRPD patterns is due to the low availability of sample.

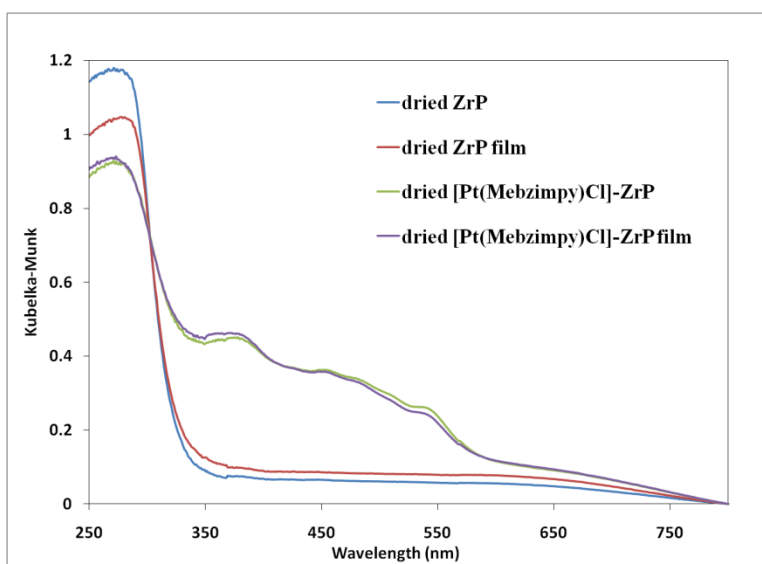

**Figure S4.** Room-temperature diffuse reflectance spectra of dried ZrP and 1:5 [Pt(Me<sub>2</sub>bzimpy)Cl]<sup>+</sup>-exchanged ZrP dried materials; and after the film preparation.

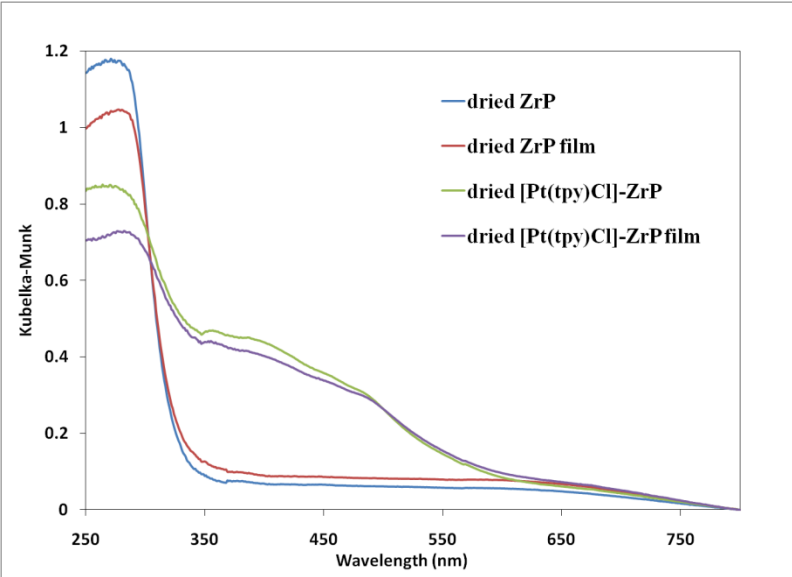

**Figure S5.** Room-temperature diffuse reflectance spectra of dried ZrP and 1:5 [Pt(tpy)Cl]<sup>+</sup>-exchanged ZrP dried materials; and after the film preparation.

| <i>Solvents</i>                     | <i>Pt(II)<br/>complex</i>                                                           | <i>Pt:ZrP</i>                                                                       |                                                                                     |                                                                                      |                                                                                       |                                                                                       |
|-------------------------------------|-------------------------------------------------------------------------------------|-------------------------------------------------------------------------------------|-------------------------------------------------------------------------------------|--------------------------------------------------------------------------------------|---------------------------------------------------------------------------------------|---------------------------------------------------------------------------------------|
|                                     |                                                                                     | <i>5:1</i>                                                                          | <i>1:1</i>                                                                          | <i>1:5</i>                                                                           | <i>1:10</i>                                                                           | <i>1:25</i>                                                                           |
| <i>Air / no<br/>vapor</i>           |  |  |  |  |  |  |
| <i>Hexane</i>                       |  |  |  |  |  |  |
| <i>Benzene</i>                      |  |  |  |  |  |  |
| <i>THF</i>                          |  |  |  |  |  |  |
| <i>CH<sub>2</sub>Cl<sub>2</sub></i> |  |  |  |  |  |  |
| <i>MeOH</i>                         |  |  |  |  |  |  |
| <i>CH<sub>3</sub>CN</i>             |  |  |  |  |  |  |
| <i>Water</i>                        |  |  |  |  |  |  |

**Figure 6S.** Photographs of [Pt(tpy)Cl]Cl complex and [Pt(tpy)Cl]<sup>+</sup>-exchanged ZrP powder materials at different loading levels (Pt:ZrP) supported on glass slides after one day exposure to solvent vapors under ambient light at room temperature.<sup>28</sup>
